# Supplementary material for: STK25 directly activates LATS1/2 independent of MST/MAP4Ks
Source: bioRxiv or medRxiv preprint supplement (doi:10.1101/354233), 2018-10-01
Supplement: Supplementary file [file 354233-1.pdf]

## Supplementary Figure 1

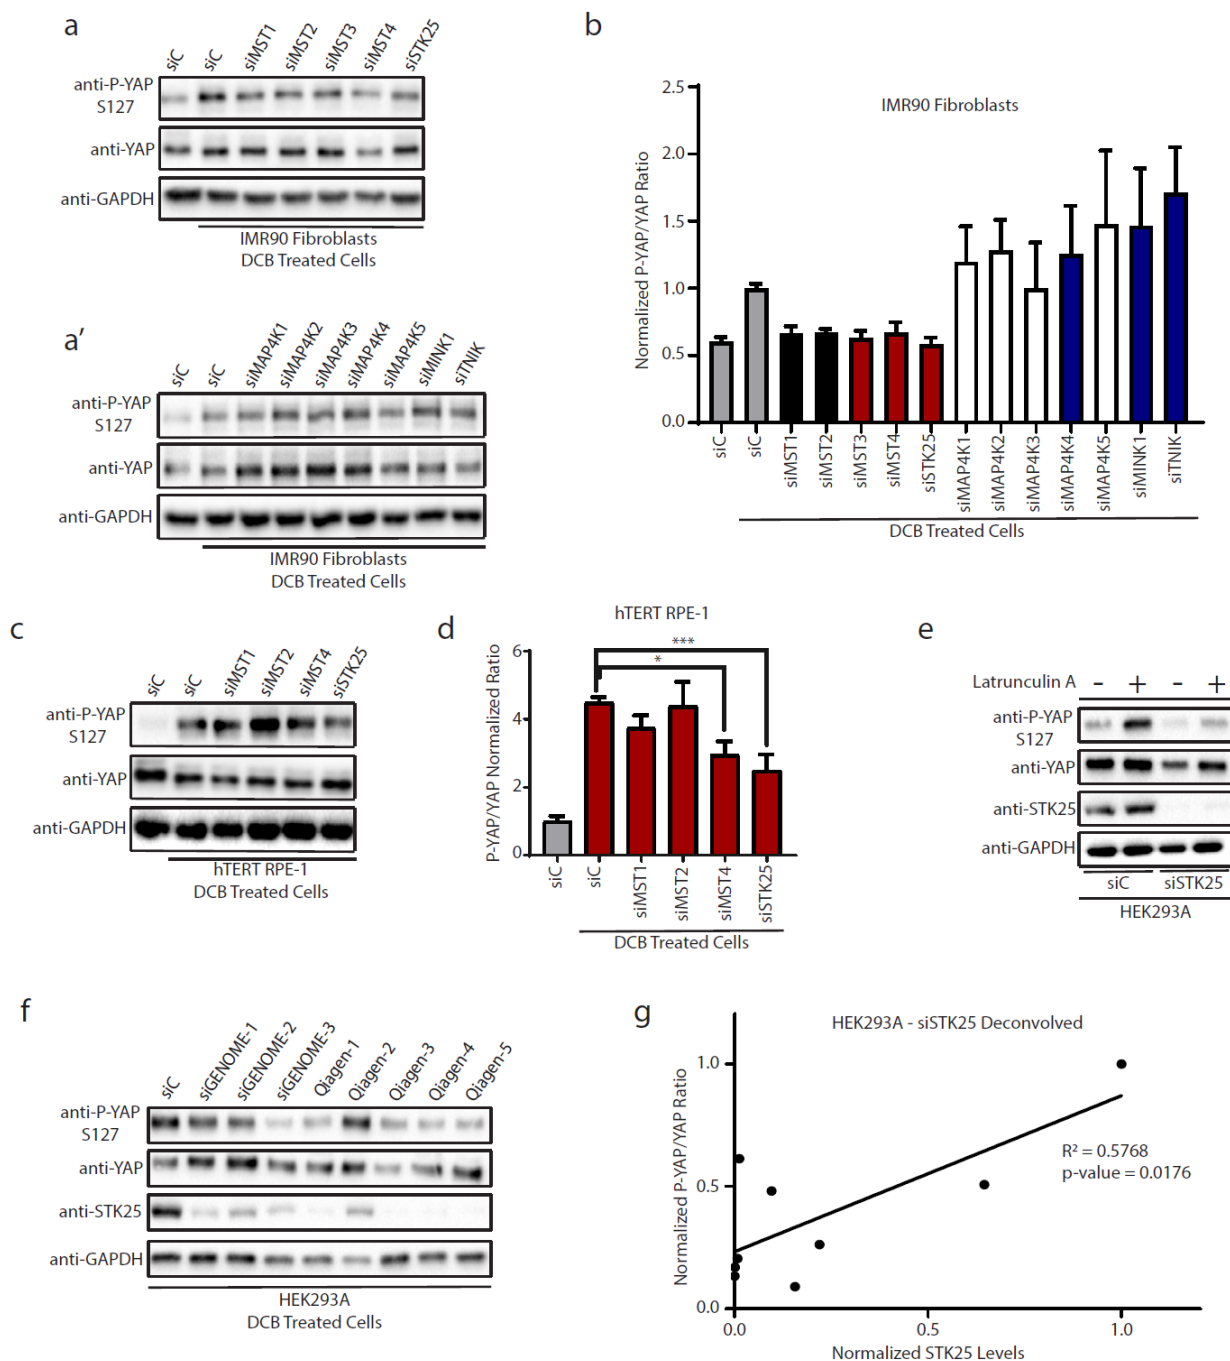

### Supplementary Figure 1. Loss of STK25 decreases YAP phosphorylation in response to actin disruption.

**a.** Representative immunoblot of YAP phosphorylation following treatment with 10  $\mu$ M DCB in IMR90 fibroblasts transfected with the indicated siRNA. **b.** Quantitation of the IMR90 focused kinome screen ( $n=3$ ,  $*p<0.05$  by One-Way ANOVA with Dunnett's post-hoc analysis). **c.** Representative immunoblot of YAP phosphorylation following treatment with 10  $\mu$ M DCB in hTERT-RPE-1 cells transfected with the siRNA. **d.** Quantitation of the RPE-1 secondary kinome screen ( $n=4$ ,  $*p<0.05$ ,  $***p<0.001$  by One-Way ANOVA with Dunnett's post-hoc analysis). **e.** Representative immunoblot of YAP phosphorylation following treatment with 1  $\mu$ g/mL Latrunculin A in HEK293A cells transfected with the indicated siRNA. **f.** Immunoblot and **g.** quantification of YAP phosphorylation and STK25 protein levels following treatment with 10  $\mu$ M DCB in HEK293A cells transfected with the indicated siRNA. STK25 protein levels were normalized to GAPDH protein levels and plotted against the respective P-YAP/YAP ratios. Linear regression was performed to assess whether a correlation existed between levels of STK25 protein expression and P-YAP/YAP ratios ( $p=0.0176$ , Pearson's  $R^2 = 0.5768$ ).

## Supplementary Figure 2

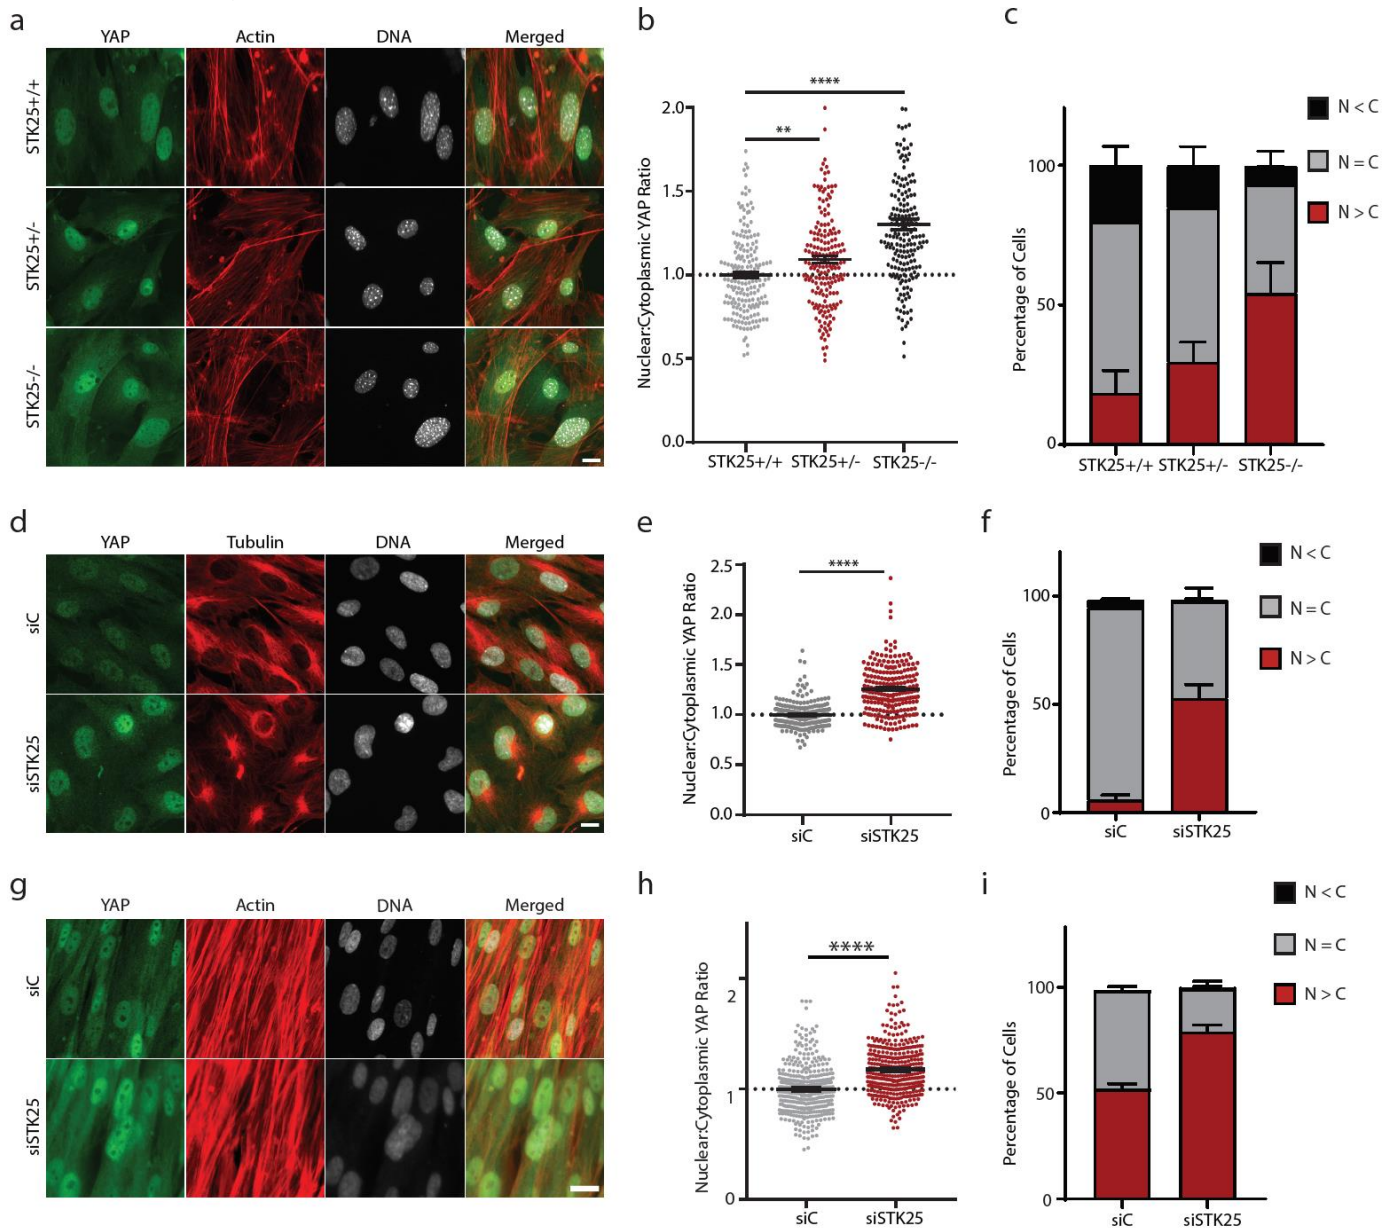

### Supplementary Figure 2. Loss of STK25 increases levels of active, nuclear YAP.

**a.** MEFs isolated from STK25<sup>+/+</sup>, STK25<sup>+/-</sup>, and STK25<sup>-/-</sup> mice were plated on coverslips and stained for YAP (Green), Actin (Red), and DNA (White). Scale bar, 20  $\mu$ m. **b.** YAP intensity was quantified and nuclear:cytoplasmic ratios were calculated for the MEF images (n>150 per group over 3 biological replicates; \*\*p<0.01, \*\*\*\*p<0.0001 by Kruskal-Wallis test with Dunn's post-test). **c.** YAP localization in the MEFs was quantified (n=3 biological replicates, N>C, YAP is enriched in the nucleus; N=C, YAP is evenly distributed between the nucleus and the cytoplasm; N<C, YAP is enriched in the cytoplasm). **d.** hTERT-RPE-1 transfected with the indicated siRNA were stained for YAP (Green), Tubulin (Red), and DNA (White). Scale bar, 20  $\mu$ m. **e.** YAP intensity was quantified and nuclear:cytoplasmic ratios were calculated for the RPE-1 experiments (n=225 over 3 biological replicates; \*\*\*\*p<0.0001 by Mann-Whitney test). **f.** YAP localization in the hTERT-RPE-1 cells was quantified (n=3 biological replicates, N>C, YAP is enriched in the nucleus; N=C, YAP is evenly distributed between the nucleus and the cytoplasm; N<C, YAP is enriched in the cytoplasm). **g.** IMR90 fibroblasts transfected with the indicated siRNA were stained for YAP (Green), Actin (Red), and DNA (White). Scale bar, 20  $\mu$ m. **h.** YAP intensity was quantified and nuclear:cytoplasmic ratios were calculated (n=300 per group over 4 biological replicates; \*\*\*\*p<0.0001, Mann-Whitney test). **i.** YAP localization in the IMR90 cells was quantified (n=4 biological replicates, N>C, YAP is enriched in the nucleus; N=C, YAP is evenly distributed between the nucleus and the cytoplasm; N<C, YAP is enriched in the cytoplasm).

## Supplementary Figure 3

a

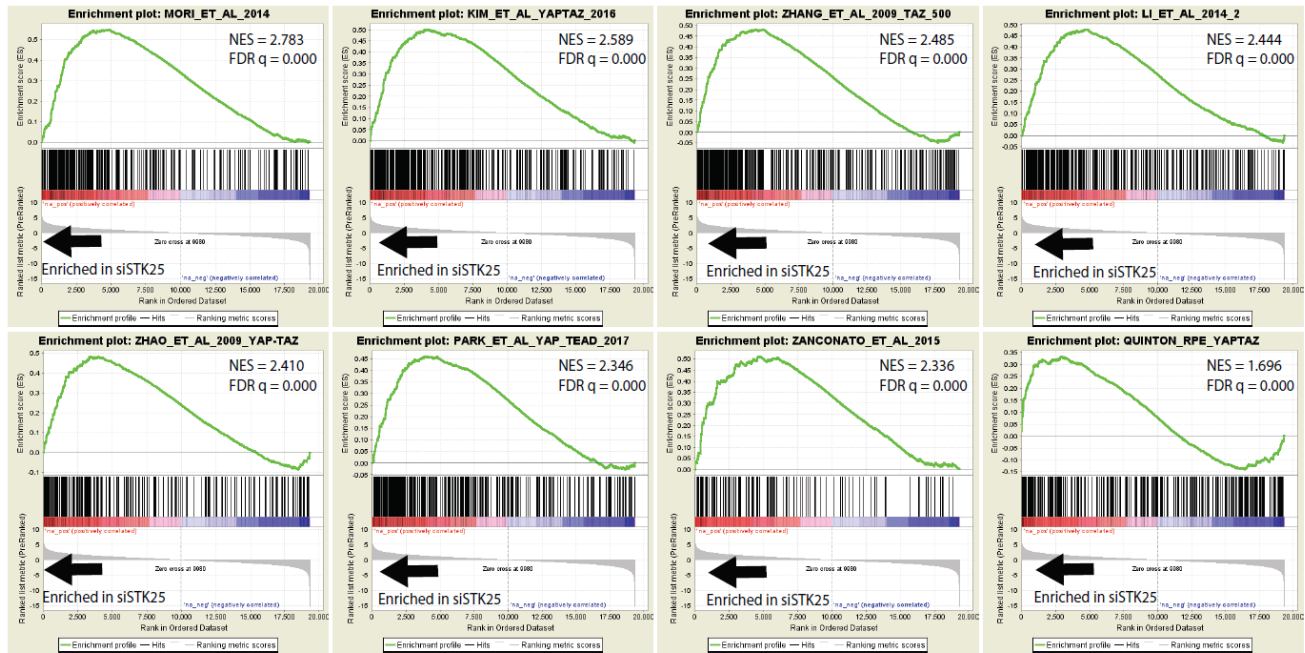

b

| Annotated Cellular Function/<br>Published YAP/TAZ gene set | Enrichment Score | Normalized<br>Enrichment Score | FDR q-value |
|------------------------------------------------------------|------------------|--------------------------------|-------------|
| Park et al. 2016                                           | 0.62             | 3.17                           | 0.000       |
| HALLMARK_MYC_TARGETS_V1                                    | 0.64             | 3.06                           | 0.000       |
| HALLMARK_E2F_TARGETS                                       | 0.63             | 3.04                           | 0.000       |
| Enzo et al. 2015                                           | 0.59             | 3.01                           | 0.000       |
| Mohseni et al. 2014                                        | 0.55             | 2.84                           | 0.000       |
| Mori et al. 2014                                           | 0.55             | 2.77                           | 0.000       |
| HALLMARK_OXIDATIVE_PHOSPHORYLATION                         | 0.56             | 2.66                           | 0.000       |
| Kim et al. 2016 – YAP/TAZ                                  | 0.50             | 2.60                           | 0.000       |
| Zhang et al. 2009 - TAZ                                    | 0.48             | 2.50                           | 0.000       |
| HALLMARK_G2M_CHECKPOINT                                    | 0.51             | 2.46                           | 0.000       |

### Supplementary Figure 3. Cells depleted of STK25 exhibit enrichment of active YAP/TAZ gene signatures.

**a.** A list of genes upregulated upon knockdown of STK25 were assessed by GSEA using a list of curated publicly available active YAP/TAZ gene sets. The remainder of the curated list, excluding the top three gene sets already presented, are shown here; with the exception of the Park et al. YAP-TEAD 2017 gene set, which can be found under the accession code GSE32597, and the Quinton YAP-TAZ gene set, which can be found under the accession code GSEXXXXX, the names of the gene sets correspond to the publications from which they were derived. **b.** A table showing relative enrichment of active YAP/TAZ gene sets in comparison to enrichment of Hallmark gene sets from the Molecular Signatures Database is presented.

## Supplementary Figure 4

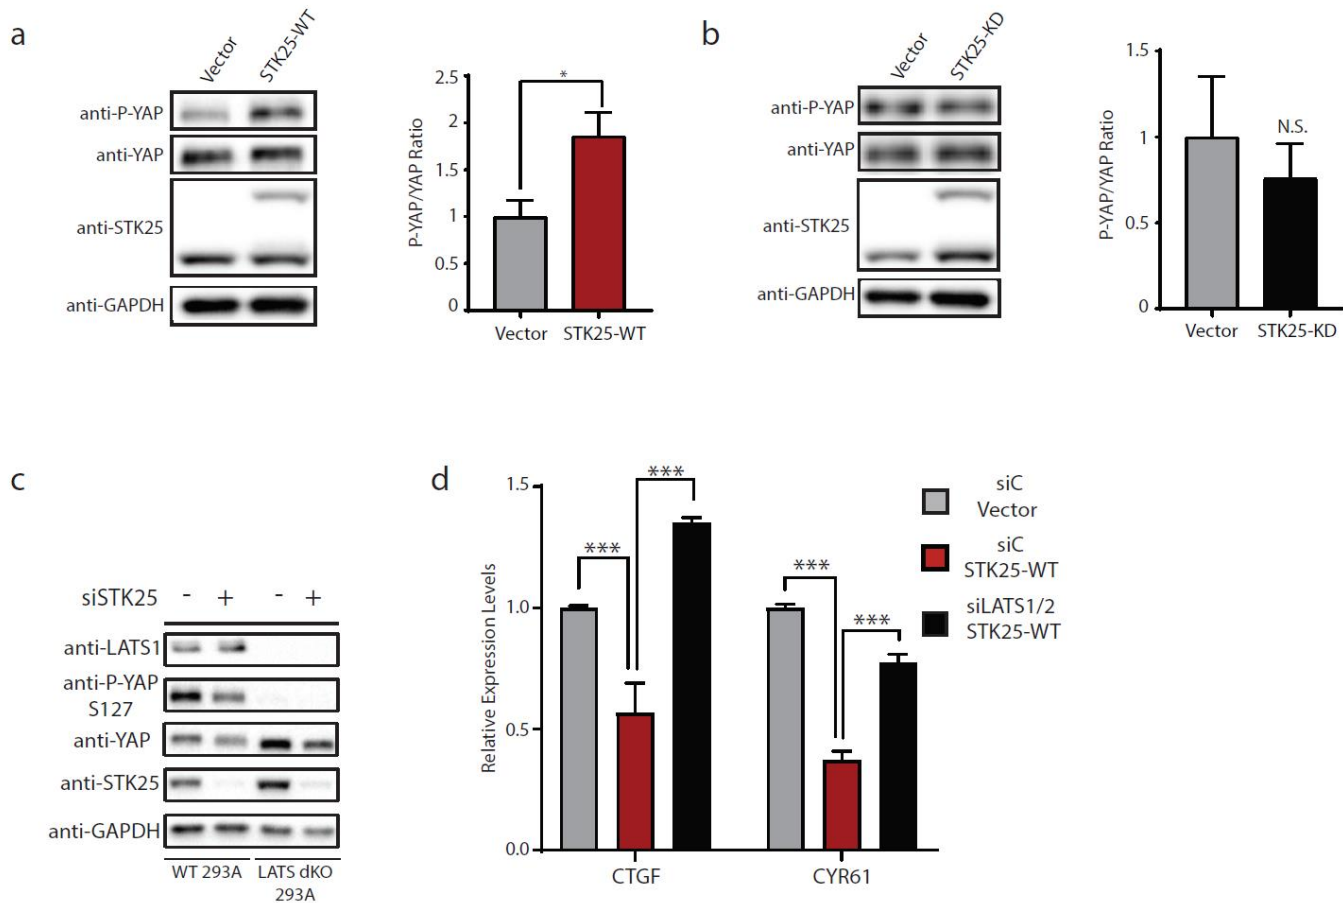

### Supplementary Figure 4. STK25 requires LATS1/2 for its inhibitory effects on YAP.

**a.** Immunoblot and quantitation of phosphorylated YAP levels in HEK293A cells stably expressing wild-type STK25 (STK25-WT) or vector control (Vector) (n=3; \*p<0.05, paired t-test). **b.** Immunoblot and quantitation of phosphorylation YAP levels in HEK293A cells stably expressing kinase-dead STK25 (STK25-KD) or vector control (Vector) (n=3; N.S. stands for not significant.) **c.** Representative immunoblot of phosphorylated YAP following STK25 knockdown in wild-type and LATS dKO HEK293A. Cells were grown to confluence in order to activate Hippo signaling to induce YAP phosphorylation. **d.** qRT-PCR analysis of YAP-target gene expression in HEK293A cells stably overexpressing either wild-type STK25 (STK25-WT) or vector control (Vector) after transfection with control siRNA or siRNAs targeting LATS1 and LATS2 (n=3; \*\*\*p<0.001, One-way ANOVA with Dunnett's post-hoc analysis; DF=2, 6; F=30.08).

## Supplementary Figure 5

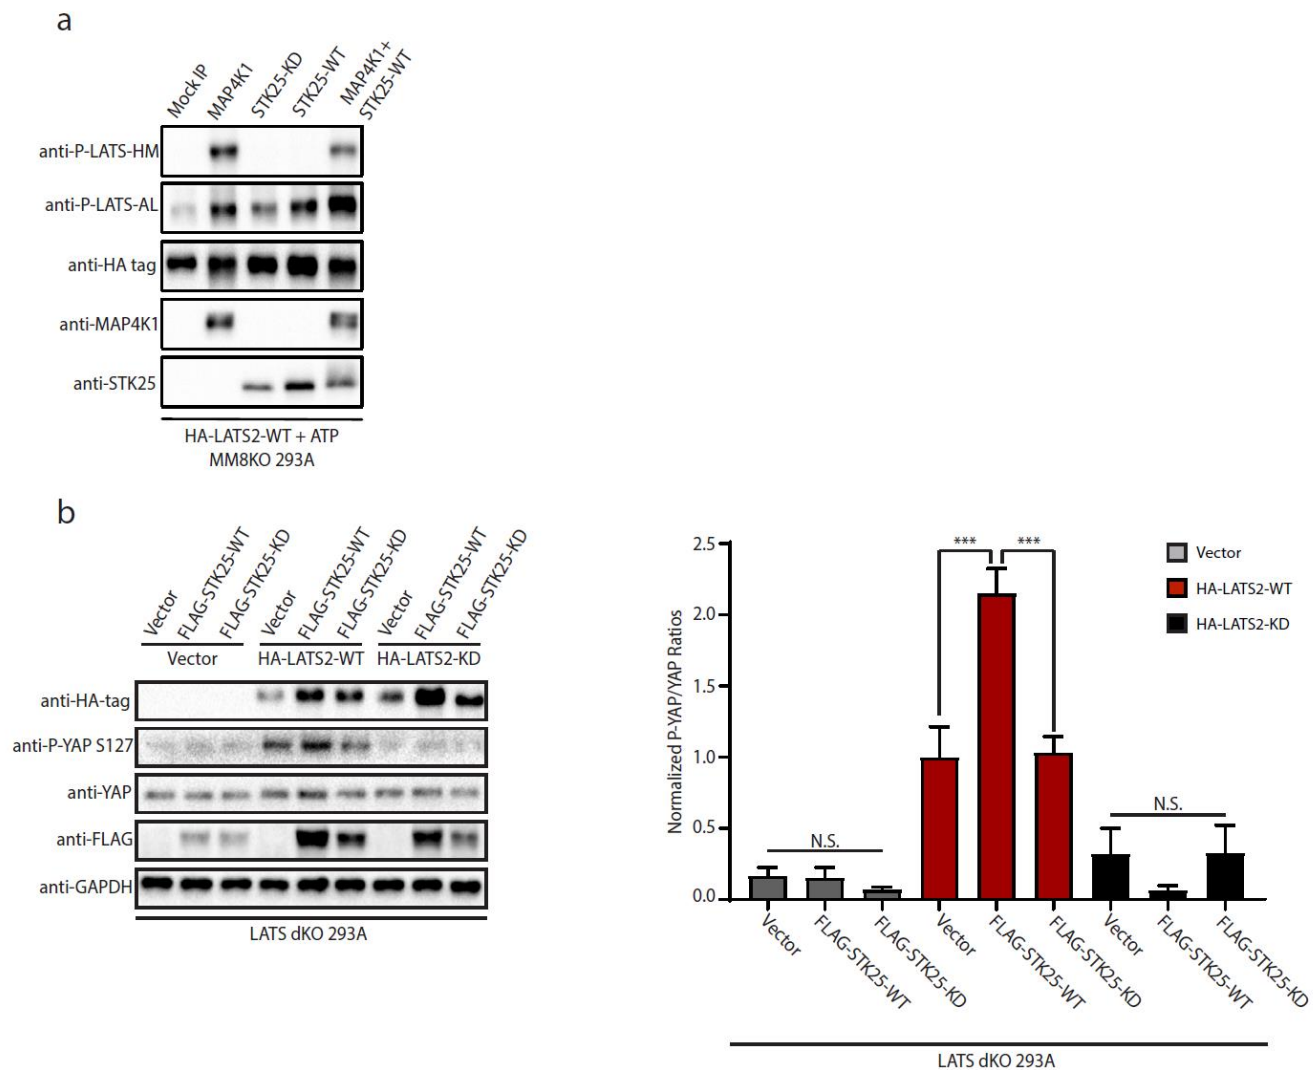

### Supplementary Figure 5. STK25 activates the LATS kinases.

**a.** IP purified wild-type LATS2 (HA-LATS2-WT) from transfected MM8KO 293A cells was co-incubated with IP purified FLAG-STK25-WT, FLAG-STK25-KD, or FLAG-MAP4K1, all from transfected MM8KO 293A. Kinase reactions were allowed to occur in the presence of 500  $\mu$ M ATP, and levels of phosphorylated LATS at the hydrophobic motif (P-LATS-HM) and activation loop motif (P-LATS-AL) were assessed via immunoblotting. A mock IP product from untransfected MM8KO 293A lysates using FLAG antibody and protein G magnetic beads served as control. **b.** LATS dKO 293A were transfected with empty vector, wild-type LATS2 (HA-LATS2-WT), or kinase-dead LATS2 (HA-LATS2-KD), alongside Vector, wild-type STK25 (FLAG-STK25-WT), or kinase-dead STK25 (FLAG-STK25-KD). Lysates were collected and assessed via SDS-PAGE and immunoblotting for YAP phosphorylation at serine127. Quantitation of YAP phosphorylation under the various transfection conditions are presented ( $n=3$ ,  $***p<0.001$ , One-Way ANOVA with Tukey's post-hoc test;  $DF=18$ ,  $F=25.93$ ).

## Supplementary Figure 6

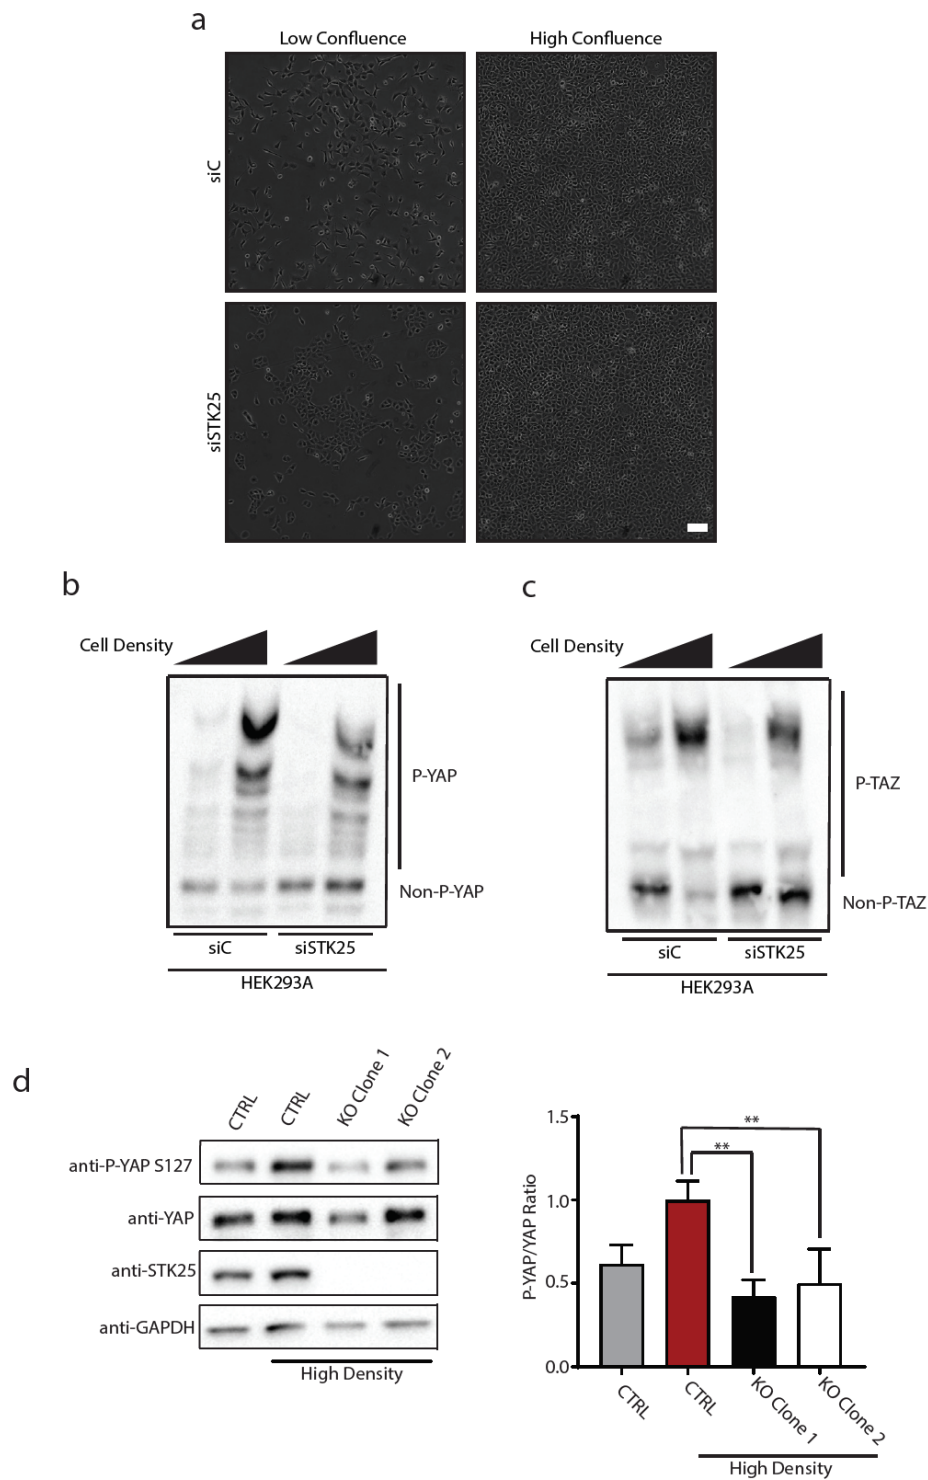

### Supplementary Figure 6. STK25 loss impairs physiologic Hippo activation.

**a.** Representative phase images of HEK293A grown to low or high confluence following transfection with the indicated siRNA. Scale bar, 100  $\mu$ m. **b.** Global phosphorylation status of YAP was assessed via phos-tag gel electrophoresis using lysates from HEK293A grown to either low or high confluence following transfection with the indicated siRNA. **c.** Global phosphorylation status of TAZ was assessed via phos-tag gel electrophoresis using lysates from HEK293A grown to either low or high confluence following transfection with the indicated siRNA. **d.** Immunoblot and quantitation of phosphorylated YAP levels under conditions of high confluence in either control HEK293A stably expressing Cas9 and a non-targeting sgRNA or STK25 KO 293A stably expressing Cas9 together with either sgRNA 1 (Clone 1) or sgRNA 2 (Clone 2) targeting STK25. (n=4; \*\*p<0.01, One-way ANOVA with Dunnett's post-hoc analysis).

Supplementary Figure 7

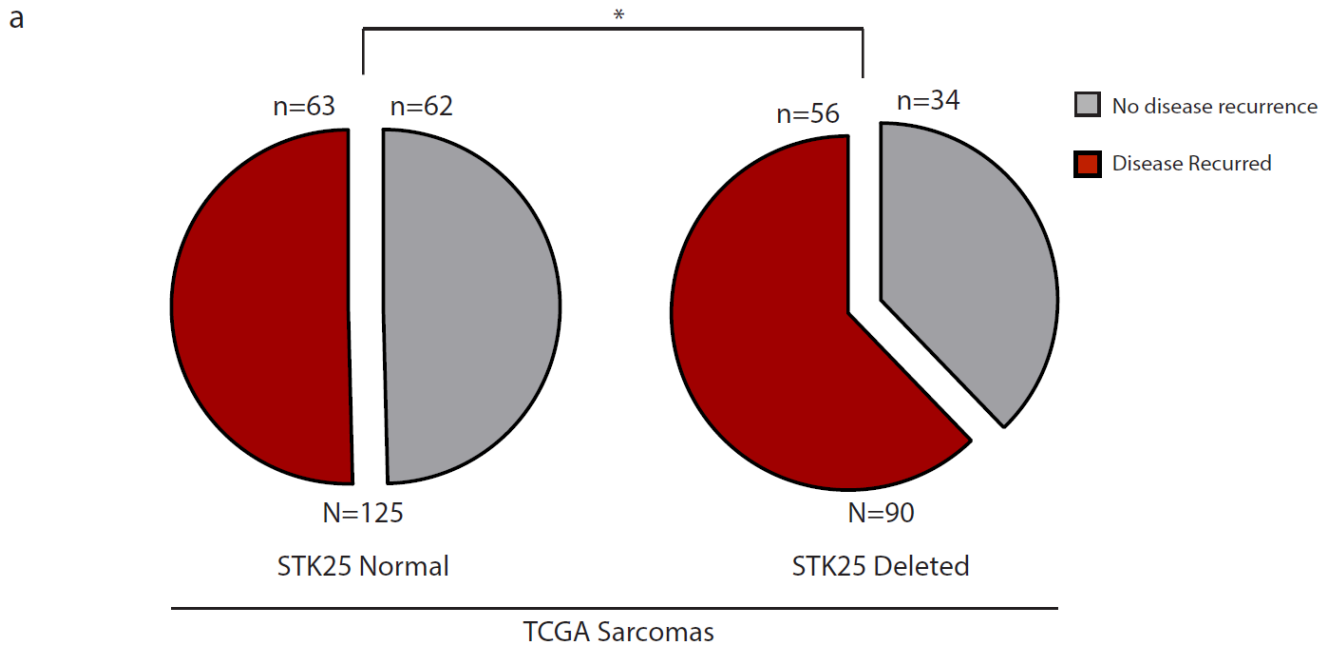

b

| Gene               | Amplified/Deleted | Q-value           | Overall Frequency |
|--------------------|-------------------|-------------------|-------------------|
| MST1               | Neither           | N/A               | N/A               |
| <b>MST2</b>        | <b>Amplified</b>  | <b>1.07 E-15</b>  | <b>0.4231</b>     |
| <b>MAP4K1</b>      | <b>Amplified</b>  | <b>1.36 E-37</b>  | <b>0.2158</b>     |
| MAP4K2             | Neither           | N/A               | N/A               |
| MAP4K3             | Neither           | N/A               | N/A               |
| MAP4K4             | Neither           | N/A               | N/A               |
| MAP4K5             | Neither           | N/A               | N/A               |
| <b>TNIK/MAP4K6</b> | <b>Amplified</b>  | <b>7.75 E-217</b> | <b>0.3284</b>     |
| MINK1/MAP4K7       | Neither           | N/A               | N/A               |
| <b>TAOK1</b>       | <b>Amplified</b>  | <b>1.55 E-7</b>   | <b>0.1857</b>     |
| TAOK2              | Neither           | N/A               | N/A               |
| TAOK3              | Neither           | N/A               | N/A               |
| <b>STK25</b>       | <b>Deleted</b>    | <b>5.61 E-223</b> | <b>0.1892</b>     |

**Supplementary Figure 7. Focal deletions of identified Hippo pathway components are rare.**

**a.** Rates of recurrence-free survival in sarcoma patients with and without deletions in *STK25* (n=125 for patients without deletions, n=90 for patients with deletions, \*p<0.05, two-tailed chi-square goodness-of-fit test).

**b.** Publicly available TCGA datasets were probed to assess rates of focal deletion in known upstream activators of LATS kinases, using the “All Cancers” dataset from the Tumorscape program online

(<http://www.broadinstitute.org/tcga/>).
